# Supplementary material for: The quality of malaria care in 25 low-income and middle-income countries
Source: PubMed Central journal article supplement — BMJ Glob Health. 2020 Feb 11;5(2):e002023. doi: 10.1136/bmjgh-2019-002023 (PMC7042579; doi:10.1136/bmjgh-2019-002023), 2020-02-11
Supplement: bmjgh-2019-002023supp001.pdf [file bmjgh-2019-002023supp001.pdf]

## Supplementary Appendix

### Appendix 1. Scoping Review for the Related Literature

**Important note:** Given that the available literature quantifying malaria care quality from previous studies was limited and not comparable across the different settings, we only used this scoping review to inform the related literature in the study. The literature found from this scoping review were not in any form used to estimate or to quantify malaria care quality in the study countries. The study used the Malaria Indicators Survey data, which provide patient-level information on febrile children under five.

A scoping review to examine previous studies pertaining to quality of malaria care among children under five in low- and middle-income countries (LMICs) was carried out from October 1 to 15, 2018. We searched PubMed using predefined search terms in regards to quality of malaria care (appendix). Only English, peer-reviewed journal articles published in the last five years were included. Using Covidence, a second reviewer blinded to the primary reviewer's decisions checked the article selection and data extraction. A third reviewer resolved any conflicts in the review decisions. We found that while an extensive array of evidence about access to malaria care insecticide-treated bed nets, diagnostics, and treatments, as well as quality of malaria diagnostic tests and drugs are available, we know much less about the quality of malaria care provision and how quality of malaria care compares across LMICs.

In view of the broad scope of this inquiry, we followed published guidance on scoping reviews. This involved use of a broad search strategy to identify relevant studies; selection of studies according to inclusion and exclusion criteria; charting the data; collating, summarizing, and reporting the results; and placing particular emphasis on consultations with relevant experts. We searched PubMed using predefined search terms related to quality of malaria care. Only English, peer-reviewed journal articles published in the last five years were included, therefore letters, editorials, conference proceedings, and grey literature, such as reports from government agencies, were excluded in the study. Abstracts and titles of articles are reviewed first in regards to our inclusion and exclusion criteria. Then, full-text articles were reviewed. Using Covidence, a second reviewer blinded to the primary reviewer's decisions checked the article selection and data extraction. Differences of opinion were discussed, and a third reviewer resolved any conflicts.

#### Pre-defined Search Terms: N=321

("Quality of Health Care"[mh:noexp] OR "Quality of Care"[tiab] OR "healthcare quality"[tiab] OR "care quality"[tiab] OR "quality of healthcare"[tiab] OR "quality of health care"[tiab] OR "quality of care"[tiab] OR "Quality Indicators, Health Care"[mh] OR health quality indicators[tiab] OR (healthcare quality indicator[tiab] OR healthcare quality indicators[tiab]) OR (care quality indicator[tiab] OR care quality indicators[tiab]) OR "Global trigger tool"[tiab] OR healthcare quality metrics[tiab] OR care quality metrics[tiab] OR (health quality measurement[tiab] OR health quality measures[tiab]) OR (healthcare quality measurement[tiab] OR healthcare quality measures[tiab]) OR (care quality measure[tiab] OR care quality measurement[tiab] OR care quality measures[tiab]) OR "Process Assessment (Health Care)"[Mh] OR "Evidence-Based Practice"[Mh:noexp] OR "Evidence-Based Medicine"[Mh] OR "Evidence-Based Nursing"[Mh] OR "Clinical Competence"[Mh] OR "clinical competency"[tiab] OR "clinical competencies"[tiab] OR "clinical skill"[tiab] OR "clinical skills"[tiab] OR "patient safety"[Mh] OR "patient safety"[tiab] OR "patient harm"[Mh] OR "patient harm"[tiab] OR "Delivery of Health Care,

Integrated"[Mh] OR "Integrated Delivery of Health Care"[tiab] OR "Integrated Delivery of Healthcare"[tiab] OR "Integrated Health Care Systems"[tiab] OR "Integrated Healthcare Systems"[tiab] OR "integrated care systems"[tiab] OR "Patient Care Planning"[Mh] OR "continuum of care"[tiab] OR "care continuum"[tiab] OR "continuity of care"[tiab] OR "care continuity"[tiab] OR "care performance"[tiab] OR "Quality Assurance, Health Care"[Mh:noexp] OR "healthcare quality assurance"[tiab] OR "care quality assurance"[tiab] OR (care quality assessment[tiab] OR care quality assessments[tiab]) OR (healthcare quality assessment[tiab] OR healthcare quality assessments[tiab]) OR "Guideline Adherence"[Mh] OR "Guideline Adherence"[tiab] OR "Protocol Compliance"[tiab] OR "Standard of Care"[Mh] OR "Standards of Care"[tiab] OR "Care Standardization"[tiab] OR "Patient Satisfaction"[Mh] OR "Patient Satisfaction"[tiab] OR (patient preference[tiab] OR patient preferences[tiab]) OR (patient experience[tiab] OR patient experienced[tiab] OR patient experiences[tiab]) OR "patient-centered care"[Mh] OR "Patient centered care"[tiab] OR "Patient centred care"[All Fields] OR "patient focused care"[tiab] OR "patient centered nursing"[tiab] OR "professional-patient relations"[Mh] OR (professional patient relation[tiab] OR professional patient relations[tiab] OR professional patient relationship[tiab] OR professional patient relationships[tiab]) OR (nurse patient relation[tiab] OR nurse patient relations[tiab] OR nurse patient relationship[tiab] OR nurse patient relationships[tiab]) OR (doctor patient relation[tiab] OR doctor patient relations[tiab] OR doctor patient relationship[tiab] OR doctor patient relationships[tiab]) OR (physician patient relation[tiab] OR physician patient relations[tiab] OR physician patient relationship[tiab] OR physician patient relationships[tiab]) OR (clinician patient relationship[tiab] OR clinician patient relationships[tiab]) OR provider attitude[tiab] OR "care efficacy"[tiab] OR "effectiveness of Care"[tiab] OR "healthcare effectiveness"[tiab] OR "care effectiveness"[tiab] OR "Structure Process Outcome"[tiab] OR "Donabedian model"[tiab] OR "quality improvement"[Mh] OR "Quality Improvement\*" [tiab]) AND ("malaria"[MeSH Terms] OR "malaria"[All Fields]) AND ("loattrfull text"[sb] AND "2013/10/13"[PDat] : "2018/10/11"[PDat] AND "humans"[MeSH Terms] AND English[lang])

Filters: a) article types: Clinical study, clinical trials, meta-analysis, reviews, observational studies, systematic; reviews; b) full text only; c) published within the last five years; d) humans; e) English; f) focuses on children up to five years

### Inclusion and exclusion criteria

| Question                                                                                                                                                 | Yes | No |
|----------------------------------------------------------------------------------------------------------------------------------------------------------|-----|----|
| 1. Is it English-only?                                                                                                                                   |     |    |
| 2. Is it peer reviewed?                                                                                                                                  |     |    |
| 3. Is it published after year 2013 or in the last five years?                                                                                            |     |    |
| 4. Does it focus in a low- and middle-income country?                                                                                                    |     |    |
| 5. Was the focus of the study on malaria?                                                                                                                |     |    |
| 6. Does it focus on quality of malaria care service delivery (in terms of case finding, diagnosis, and treatment)?                                       |     |    |
| 7. Does it focus on quality of the malaria diagnostic tools (e.g. mRDTs, microscopy) or drugs (artemisinin, etc)? If yes, please exclude these articles. |     |    |

### Other areas for exclusion:

1. The paper is focusing on quality assessment of pharmaceutical products, surgical interventions, diagnostic tools or vaccines for roll-out
2. The paper is a viewpoint, protocol for a study, call for papers, editorials, opinion paper, correspondence, letter, or news article.

3. The paper focuses on prospective studies, proposals, simulations, or mathematical modeling of potential effects of a program/intervention
7. The paper focuses on improvements on information technology infrastructure (e.g. communications systems, databases, or surveillance systems)
8. The paper focuses on specialized areas: military or troops, conflict-affected states, including focusing on refugees or for humanitarian contexts
8. The paper focuses on determinants of health outcomes (e.g. quality of life) without assessment of any existing programs implemented to improve quality of health care services; thus, focuses on quality of life instead of quality of care
9. The paper focuses on developing approaches or solutions for considerations in the future'
10. The paper focuses on traveler's malaria or on pregnant women to protect their unborn from malaria
11. The paper focuses on modeling possible malaria scenarios
12. The paper focuses on costing of malaria treatment options or other interventions.

### Full Text Studies Included

1. Amboko BI, Ayieko P, Ogero M, Julius T, Irimu G, English M. Malaria investigation and treatment of children admitted to county hospitals in western Kenya. *Malaria journal* 2016; **15**(1): 506-.
2. Bamiselu OF, Ajayi I, Fawole O, et al. Adherence to malaria diagnosis and treatment guidelines among healthcare workers in Ogun State, Nigeria. *BMC public health* 2016; **16**(1): 828-.
3. Bawate C, Callender-Carter ST, Nsajju B, Bwayo D. Factors affecting adherence to national malaria treatment guidelines in management of malaria among public healthcare workers in Kamuli District, Uganda. *Malaria journal* 2016; **15**: 112-.
4. Boadu NY, Amuasi J, Ansong D, Einsiedel E, Menon D, Yanow SK. Challenges with implementing malaria rapid diagnostic tests at primary care facilities in a Ghanaian district: a qualitative study. *Malaria journal* 2016; **15**: 126-.
5. Boyce MR, O'Meara WP. Use of malaria RDTs in various health contexts across sub-Saharan Africa: a systematic review. *BMC public health* 2017; **17**(1): 470-.
6. Bruxvoort KJ, Leurent B, Chandler CIR, et al. The Impact of Introducing Malaria Rapid Diagnostic Tests on Fever Case Management: A Synthesis of Ten Studies from the ACT Consortium. *The American journal of tropical medicine and hygiene* 2017; **97**(4): 1170-9.
7. Buregyeya E, Rutebemberwa E, LaRussa P, et al. Comparison of the capacity between public and private health facilities to manage under-five children with febrile illnesses in Uganda. *Malaria journal* 2017; **16**(1): 183-.
8. Ezenduka CC, Ogbonna BO, Ekwunife OI, Okonta MJ, Esimone CO. Drugs use pattern for uncomplicated malaria in medicine retail outlets in Enugu urban, southeast Nigeria: implications for malaria treatment policy. *Malaria journal* 2014; **13**: 243-.
9. Faust C, Zelner J, Brasseur P, et al. Assessing drivers of full adoption of test and treat policy for malaria in Senegal. *The American journal of tropical medicine and hygiene* 2015; **93**(1): 159-67.
10. Fernando SD, Ainan S, Premaratne RG, Rodrigo C, Jayanetti SR, Rajapakse S. Challenges to malaria surveillance following elimination of indigenous transmission: findings from a hospital-based study in rural Sri Lanka. *International health* 2015; **7**(5): 317-23.

11. Galactionova K, Tediosi F, de Savigny D, Smith T, Tanner M. Effective coverage and systems effectiveness for malaria case management in sub-Saharan African countries. *PloS one* 2015; **10**(5): e0127818-e.
12. Gathara D, Nyamai R, Were F, et al. Moving towards routine evaluation of quality of inpatient pediatric care in Kenya. *PloS one* 2015; **10**(3): e0117048-e.
13. Hooft AM, Ripp K, Ndenga B, et al. Principles, practices and knowledge of clinicians when assessing febrile children: a qualitative study in Kenya. *Malaria journal* 2017; **16**(1): 381-.
14. Ibe OP, Mangham-Jefferies L, Cundill B, Wiseman V, Uzochukwu BS, Onwujekwe OE. Quality of care for the treatment for uncomplicated malaria in South-East Nigeria: how important is socioeconomic status? *International journal for equity in health* 2015; **14**: 19-.
15. Johansson EW, Gething PW, Hildenwall H, et al. Effect of diagnostic testing on medicines used by febrile children less than five years in 12 malaria-endemic African countries: a mixed-methods study. *Malaria journal* 2015; **14**: 194-.
16. Kabaghe AN, Phiri MD, Phiri KS, van Vugt M. Challenges in implementing uncomplicated malaria treatment in children: a health facility survey in rural Malawi. *Malaria journal* 2017; **16**(1): 419-.
17. Kabaghe AN, Visser BJ, Spijker R, Phiri KS, Grobusch MP, van Vugt M. Health workers' compliance to rapid diagnostic tests (RDTs) to guide malaria treatment: a systematic review and meta-analysis. *Malaria journal* 2016; **15**: 163-.
18. Kathirvel S, Tripathy JP, Tun ZM, et al. Physicians' compliance with the National Drug Policy on Malaria in a tertiary teaching hospital, India, from 2010 to 2015: a mixed method study. *Transactions of the Royal Society of Tropical Medicine and Hygiene* 2017; **111**(2): 62-70.
19. Kaula H, Buyungo P, Opigo J. Private sector role, readiness and performance for malaria case management in Uganda, 2015. *Malaria journal* 2017; **16**(1): 219-.
20. Kwarteng A, Asante KP, Abokyi L, et al. Provider compliance to artemisinin-based combination therapy at primary health care facilities in the middle belt of Ghana. *Malaria journal* 2015; **14**: 361-.
21. Ladner J, Davis B, Audureau E, Saba J. Treatment-seeking patterns for malaria in pharmacies in five sub-Saharan African countries. *Malaria journal* 2017; **16**(1): 353-.
22. Landman KZ, Jean SE, Existe A, et al. Evaluation of case management of uncomplicated malaria in Haiti: a national health facility survey, 2012. *Malaria journal* 2015; **14**: 394-.
23. Littrell M, Miller JM, Ndhlovu M, et al. Documenting malaria case management coverage in Zambia: a systems effectiveness approach. *Malaria journal* 2013; **12**: 371-.
24. Lunze K, Biemba G, Lawrence JJ, et al. Clinical management of children with fever: a cross-sectional study of quality of care in rural Zambia. *Bulletin of the World Health Organization* 2017; **95**(5): 333-42.
25. Makumbe B, Tshuma C, Shambira G, et al. Evaluation of severe malaria case management in Mazowe District, Zimbabwe, 2014. *The Pan African medical journal* 2017; **27**: 33-.
26. Manyando C, Njunju EM, Chileshe J, Siziya S, Schiff C. Rapid diagnostic tests for malaria and health workers' adherence to test results at health facilities in Zambia. *Malaria journal* 2014; **13**: 166-.

27. Moon AM, Biggs HM, Rubach MP, et al. Evaluation of in-hospital management for febrile illness in Northern Tanzania before and after 2010 World Health Organization Guidelines for the treatment of malaria. *PloS one* 2014; **9**(2): e89814-e.
28. Ndhlovu M, Nkhama E, Miller JM, Hamer DH. Antibiotic prescribing practices for patients with fever in the transition from presumptive treatment of malaria to 'confirm and treat' in Zambia: a cross-sectional study. *Tropical medicine & international health : TM & IH* 2015; **20**(12): 1696-706.
29. Pulford J, Kurumop SF, Ura Y, Siba PM, Mueller I, Hetzel MW. Malaria case management in Papua New Guinea following the introduction of a revised treatment protocol. *Malaria journal* 2013; **12**: 433-.
30. Pulford J, Smith I, Mueller I, Siba PM, Hetzel MW. Health Worker Compliance with a 'Test And Treat' Malaria Case Management Protocol in Papua New Guinea. *PloS one* 2016; **11**(7): e0158780-e.
31. Ruizendaal E, Dierickx S, Peeters Grietens K, Schallig HDFH, Pagnoni F, Mens PF. Success or failure of critical steps in community case management of malaria with rapid diagnostic tests: a systematic review. *Malaria journal* 2014; **13**: 229-.
32. Salomao CA, Sacarlal J, Chilundo B, Gudo ES. Prescription practices for malaria in Mozambique: poor adherence to the national protocols for malaria treatment in 22 public health facilities. *Malaria journal* 2015; **14**: 483-.
33. Saweri OPM, Hetzel MW, Mueller I, Siba PM, Pulford J. The treatment of non-malarial febrile illness in Papua New Guinea: findings from cross sectional and longitudinal studies of health worker practice. *BMC health services research* 2017; **17**(1): 10-.
34. Sears D, Mpimbaza A, Kigozi R, et al. Quality of inpatient pediatric case management for four leading causes of child mortality at six government-run Ugandan hospitals. *PloS one* 2015; **10**(5): e0127192-e.
35. Steinhardt LC, Chinkhumba J, Wolkon A, et al. Patient-, health worker-, and health facility-level determinants of correct malaria case management at publicly funded health facilities in Malawi: results from a nationally representative health facility survey. *Malaria journal* 2014; **13**: 64-.
36. Steinhardt LC, Chinkhumba J, Wolkon A, et al. Quality of malaria case management in Malawi: results from a nationally representative health facility survey. *PloS one* 2014; **9**(2): e89050-e.
37. Zurovac D, Githinji S, Memusi D, et al. Major improvements in the quality of malaria case-management under the "test and treat" policy in Kenya. *PloS one* 2014; **9**(3): e92782-e.
38. Zurovac D, Guintran J-O, Donald W, Naket E, Malinga J, Taleo G. Health systems readiness and management of febrile outpatients under low malaria transmission in Vanuatu. *Malaria journal* 2015; **14**: 489-.

## Appendix 2. Country context gathered from malaria reports

**Country context.** There were 114 million children under-five living in the 25 study countries, of which 215 per 1000 population were at risk of malaria resulting to a mean of 8.3% (n=288,400) malaria deaths (Table 1). The highest percentage of malaria deaths among children under-five were in Burkina Faso (24.6%, n=15,556) in 2014 followed by Mali (24.4%, n=20,251) in 2015. The lowest recorded malaria deaths among children under-five were in Cambodia (0.3%, n=145) in 2005 and Ethiopia (0.8%, n=1,550) in 2016. Across all study countries, the average *P. Falciparum* endemicity is 86%. The highest recorded was in Swaziland at 99%, followed by Malawi and Mozambique both at 90%. The lowest recorded was in Ethiopia at 65%, followed by Burkina Faso (80%) and Nigeria (85%).

| Country      | Year <sup>a</sup> | Population:<br>under five<br>children<br>(in thousands) <sup>b</sup> | Incidence of<br>malaria per 1000<br>population at<br>risk <sup>c</sup> | Malaria deaths among under five children <sup>d</sup> |            |
|--------------|-------------------|----------------------------------------------------------------------|------------------------------------------------------------------------|-------------------------------------------------------|------------|
|              |                   |                                                                      |                                                                        | n                                                     | %*         |
| Burkina Faso | 2014              | 3 161                                                                | 389                                                                    | 15 556                                                | 24.6       |
| Mali         | 2015              | 3 274                                                                | 449                                                                    | 20 251                                                | 24.4       |
| Sierra Leone | 2016              | 1 135                                                                | 303                                                                    | 6 459                                                 | 19.6       |
| Togo         | 2017              | 1 162                                                                | 345                                                                    | 3 725                                                 | 18.8       |
| Nigeria      | 2015              | 31 109                                                               | 381                                                                    | 93 446                                                | 12.5       |
| Mozambique   | 2015              | 4 844                                                                | 298                                                                    | 9 877                                                 | 12.1       |
| Ghana        | 2016              | 4 023                                                                | 266                                                                    | 6 006                                                 | 11.1       |
| Cameroon     | 2011              | 3 395                                                                | 322                                                                    | 9 094                                                 | 10.1       |
| Liberia      | 2016              | 705                                                                  | 246                                                                    | 1 023                                                 | 8.6        |
| Malawi       | 2017              | 2 888                                                                | 189                                                                    | 2 980                                                 | 7.8        |
| Burundi      | 2012              | 1 577                                                                | 198                                                                    | 2 548                                                 | 6.7        |
| Uganda       | 2015              | 7 512                                                                | 218                                                                    | 6 500                                                 | 6.7        |
| Zambia       | 2014              | 2 750                                                                | 174                                                                    | 2 638                                                 | 6.6        |
| Rwanda       | 2013              | 1 735                                                                | 301                                                                    | 848                                                   | 6.0        |
| Angola       | 2011              | 4 512                                                                | 114                                                                    | 6 938                                                 | 5.6        |
| Tanzania     | 2012              | 8 226                                                                | 114                                                                    | 7 097                                                 | 5.5        |
| Senegal      | 2009              | 2 175                                                                | 141                                                                    | 1 310                                                 | 4.1        |
| Gambia       | 2013              | 310                                                                  | 209                                                                    | 217                                                   | 4.0        |
| Kenya        | 2015              | 6 997                                                                | 166                                                                    | 2 959                                                 | 3.9        |
| Madagascar   | 2016              | 3 700                                                                | 104                                                                    | 2 565                                                 | 3.6        |
| Zimbabwe     | 2015              | 2 505                                                                | 114                                                                    | 1 066                                                 | 2.2        |
| Namibia      | 2013              | 335                                                                  | 14                                                                     | 14                                                    | 1.0        |
| Ethiopia     | 2016              | 14 901                                                               | 59                                                                     | 1 550                                                 | 0.8        |
| Cambodia     | 2005              | 1 531                                                                | 49                                                                     | 145                                                   | 0.3        |
| Swaziland    | 2007              | 169                                                                  | n/a                                                                    | n/a                                                   | n/a        |
|              |                   | <b>114 632</b>                                                       | <b>215</b>                                                             | <b>288 400</b>                                        | <b>8.3</b> |

a. All country contexts correspond to the survey year

Data sources: b. United Nations Population Division Department of Economic and Social Affairs World Population Prospects (2017), c. World Health Organization Global Health Observatory Data Repository, d. UNICEF Estimates of child cause of death (February 2018)

\* Refers to percent of deaths due to malaria among children under-five

### Appendix 3. Defining poor malaria care quality

WHO recommends prompt malaria diagnosis either by microscopy or mRDTs in all patients with suspected malaria before treatment is administered. [14] In all countries but Cambodia, *Plasmodium Falciparum* is the usual causative agent of malaria as it is highly endemic in these countries. WHO recommends artemisinin-based combination therapies (ACTs) for the treatment of uncomplicated malaria caused by *P. Falciparum* parasite. ACTs combine two active ingredients with different mechanisms of action and are the most effective antimalarial medicines available today. As such, monotherapies or use of only one drug were not recommended since use of single drugs may promote the development of artemisinin resistance. [14] Following these guidelines, we then selected relevant testing and treatment variables available in the MIS. Thus, we defined poor malaria care quality as those instances wherein a patient encountered the following during each treatment cascade:

1. Malaria testing – a febrile patient was not blood tested,
2. Malaria treatment provision – a febrile patient was treated with one antimalarial drug or three or more antimalarial drugs. Given that not all countries provide an account of the antimalarial drugs given to the patient and since the data on antimalarial drugs were based on the women's recall of drugs given to their child under-five, we presupposed that reporting provision of two antimalarial drugs suggest artemisinin-based combination therapies (ACTs) provision; thus, may have been appropriate care. Otherwise, if a patient was provided none, one, or three or more antimalarial drugs, the treatment was considered inappropriate and were counted towards poor quality of care. The WHO recommended care for treating uncomplicated *P. Falciparum* malaria cases with one of the following ACTs: artemether + lumefantrine, artesunate + amodiaquine, artesunate + mefloquine, dihydroartemisinin + piperaquine, or artesunate + sulfadoxine-pyrimethamine. [14]
3. Malaria treatment timeliness – a febrile patient receiving malaria care only after twenty-four hours from the onset of fever. It would have been ideal to determine timely care by examining whether or not they received malaria care within twenty-four hours from the time they sought care or when they first saw a healthcare provider. Unfortunately, existing data only provide time from the onset of fever.

We limited our analysis among febrile children who sought medical care. We then calculated the number of times the patient had inappropriate care out of the total number of possible treatment encounters per patient. See flow diagram in the next page for the number of eligible for each treatment cascade.

Flow diagram of samples for each treatment cascade:

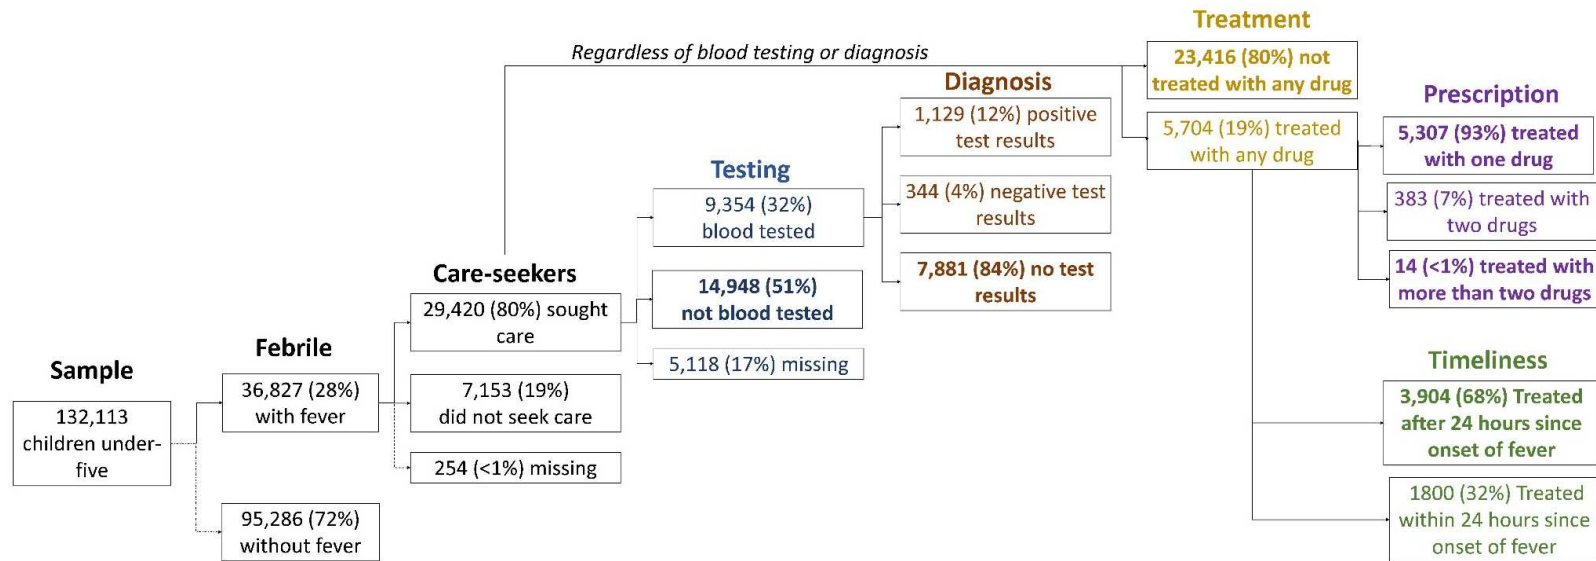

Note: All numbers are unweighted. For each text box, those in bold were added to define poor malaria care quality. The percentages were calculated as out of the total sample for each treatment cascade and not as averages across the 25 countries reported in the manuscript.



#### Appendix 4. Incorrect malaria case management: Prevalence of poor quality among kids tested for Malaria in four select countries with additional laboratory test results

We are able to estimate this patient-level outcome for the four study countries with actual malaria laboratory test results, which allow us to determine which patients had malaria. Our outcome of interest was the proportion of cases that were incorrectly managed, either due to undertreatment or overtreatment. We define undertreatment as any instance when a febrile child under-five had positive malaria test results, but did not receive any antimalarial drug (not treated), or received only one antimalarial drug instead of the WHO recommended combination drugs (treated with one drug). [14] In contrast, we define overtreatment as any instance when a febrile child under-five had positive malaria test results, but was treated with three or more antimalarial drugs, or had negative malaria test results, but was treated with any number of antimalarial drugs.

Of the four countries that had additional data on malaria laboratory test results (Angola, Ghana, Nigeria, and Senegal), a mean of 35% of cases were incorrectly managed (Table 4). Undertreatment was noted in 26% (n=1,992) of cases, while overtreatment occurred at 9% (n=952). Among those who were undertreated, 81% of cases with positive malaria test results were not treated with any antimalarial drug and 13% were treated with one antimalarial drug. Among those who were overtreated, 0.41% of cases with positive malaria test results were treated with three or more antimalarial drugs, while for cases with negative malaria test results, about 13% were treated with antimalarial drugs (10% with one antimalarial drug, 2% with ACT, and 0.18% with three or more drugs). Under- and overtreatment calculations were not weighted to get the true proportions of care for each treatment cascade described above.

|                        | Angola           | Ghana            | Nigeria          | Senegal          | Cases incorrectly managed |
|------------------------|------------------|------------------|------------------|------------------|---------------------------|
| <b>With malaria</b>    |                  |                  |                  |                  |                           |
| 1. Undertreatment      | 407 (14%)        | 633 (63%)        | 330 (13%)        | 622 (12%)        | 1992 (26%)                |
| 2. Overtreatment       | 0 (0%)           | 0 (0%)           | 3 (1%)           | 5 (1%)           | 8 (0.4%)                  |
| <b>Without malaria</b> |                  |                  |                  |                  |                           |
| 1. Overtreatment       | 221 (9%)         | 37 (13%)         | 541 (24%)        | 145 (4%)         | 944 (12%)                 |
| <b>Total</b>           | <b>628 (22%)</b> | <b>670 (67%)</b> | <b>874 (34%)</b> | <b>772 (15%)</b> | <b>2944 (35%)</b>         |

All percentages for test results column were calculated out of the number of positive and negative test results for every country.

a.

| Country | Tested | Total undertreated | %     | Total overtreated | %     |
|---------|--------|--------------------|-------|-------------------|-------|
| Angola  | 2901   | 407                | 14.0% | 221               | 7.6%  |
| Ghana   | 997    | 633                | 63.5% | 37                | 3.7%  |
| Nigeria | 2548   | 330                | 13.0% | 544               | 21.4% |
| Senegal | 5046   | 622                | 12.3% | 150               | 3.0%  |

b.

| Country | Test results | Undertreatment |             |                       |                       | Overtreatment    |                        |                      |      |
|---------|--------------|----------------|-------------|-----------------------|-----------------------|------------------|------------------------|----------------------|------|
|         |              | Positives      | Not treated | %                     | Treated with one drug | %                | Treated with > 2 drugs | %                    |      |
| Angola  | 410          | 371            | 90.5%       | 36                    | 8.8%                  | 0                | 0.0%                   |                      |      |
| Ghana   | 717          | 562            | 78.4%       | 71                    | 9.9%                  | 0                | 0.0%                   |                      |      |
| Nigeria | 360          | 226            | 62.8%       | 104                   | 28.9%                 | 3                | 0.8%                   |                      |      |
| Senegal | 634          | 589            | 92.9%       | 33                    | 5.2%                  | 5                | 0.8%                   |                      |      |
|         |              | Overtreatment  |             |                       |                       |                  |                        |                      |      |
| Country | Negatives    | Not treated    | %           | Treated with one drug | %                     | Treated with ACT | %                      | Treated with > drugs | %    |
| Angola  | 2491         | 2252           | 90.4%       | 221                   | 8.9%                  | 0                | 0.0%                   | 0                    | 0.0% |
| Ghana   | 280          | 243            | 86.8%       | 20                    | 7.1%                  | 17               | 6.1%                   | 0                    | 0.0% |
| Nigeria | 2188         | 1583           | 72.3%       | 510                   | 23.3%                 | 24               | 1.1%                   | 7                    | 0.3% |
| Senegal | 4412         | 4256           | 96.5%       | 115                   | 2.6%                  | 12               | 0.3%                   | 18                   | 0.4% |

## Appendix 5. Other potential primary outcome measures

| Country      | Patient encounters |            | Patient encounters with overtreatment |            | Cases who had at least one problem |            | Cases who had only one problem |            | Cases who had two problems |            | Cases who had all three problems |           |
|--------------|--------------------|------------|---------------------------------------|------------|------------------------------------|------------|--------------------------------|------------|----------------------------|------------|----------------------------------|-----------|
|              | n                  | %          | n                                     | %          | n                                  | %          | n                              | %          | n                          | %          | n                                | %         |
| Tanzania     | 2925               | 69%        | 2925                                  | 69%        | 1405                               | 99%        | 239                            | 17%        | 829                        | 59%        | 338                              | 24%       |
| Nigeria      | 4320               | 66%        | 4330                                  | 66%        | 2195                               | 99%        | 377                            | 17%        | 1509                       | 68%        | 313                              | 14%       |
| Mozambique   | 1983               | 65%        | 1983                                  | 65%        | 1004                               | 99%        | 215                            | 21%        | 649                        | 64%        | 141                              | 14%       |
| Mali         | 3207               | 65%        | 3207                                  | 65%        | 1621                               | 98%        | 225                            | 14%        | 1206                       | 73%        | 183                              | 11%       |
| Cambodia     | 2066               | 65%        | 2066                                  | 65%        | 1061                               | 100%       | 74                             | 7%         | 986                        | 93%        | 0                                | 0%        |
| Burkina Faso | 4179               | 64%        | 4179                                  | 64%        | 2182                               | 99%        | 539                            | 25%        | 1348                       | 61%        | 295                              | 13%       |
| Madagascar   | 1704               | 63%        | 1704                                  | 63%        | 899                                | 100%       | 156                            | 17%        | 698                        | 78%        | 45                               | 5%        |
| Togo         | 1314               | 62%        | 1314                                  | 62%        | 704                                | 99%        | 145                            | 21%        | 518                        | 73%        | 45                               | 6%        |
| Zimbabwe     | 889                | 61%        | 889                                   | 61%        | 486                                | 100%       | 85                             | 17%        | 400                        | 82%        | 1                                | 0%        |
| Angola       | 1635               | 60%        | 1635                                  | 60%        | 896                                | 98%        | 250                            | 27%        | 566                        | 62%        | 87                               | 10%       |
| Namibia      | 770                | 60%        | 770                                   | 60%        | 433                                | 100%       | 94                             | 22%        | 336                        | 78%        | 3                                | 1%        |
| Malawi       | 1850               | 57%        | 1850                                  | 57%        | 1070                               | 99%        | 384                            | 35%        | 646                        | 60%        | 40                               | 4%        |
| Cameroon     | 1371               | 57%        | 1371                                  | 57%        | 1190                               | 99%        | 995                            | 83%        | 197                        | 16%        | 0                                | 0%        |
| Ethiopia     | 712                | 57%        | 714                                   | 57%        | 620                                | 99%        | 537                            | 86%        | 86                         | 14%        | 0                                | 0%        |
| Uganda       | 2219               | 56%        | 2219                                  | 56%        | 1327                               | 100%       | 495                            | 37%        | 796                        | 60%        | 42                               | 3%        |
| Rwanda       | 1080               | 55%        | 1080                                  | 55%        | 656                                | 100%       | 235                            | 36%        | 413                        | 63%        | 6                                | 1%        |
| Gambia       | 592                | 54%        | 592                                   | 54%        | 369                                | 99%        | 144                            | 39%        | 222                        | 60%        | 4                                | 1%        |
| Ghana        | 1317               | 53%        | 1317                                  | 53%        | 803                                | 97%        | 358                            | 43%        | 407                        | 49%        | 53                               | 6%        |
| Kenya        | 1808               | 53%        | 1808                                  | 53%        | 1141                               | 100%       | 482                            | 42%        | 648                        | 57%        | 6                                | 1%        |
| Burundi      | 1641               | 52%        | 1647                                  | 53%        | 1068                               | 100%       | 514                            | 48%        | 536                        | 50%        | 18                               | 2%        |
| Swaziland    | 589                | 50%        | 589                                   | 50%        | 586                                | 100%       | 582                            | 99%        | 4                          | 1%         | 0                                | 0%        |
| Senegal      | 3038               | 50%        | 3080                                  | 50%        | 2904                               | 99%        | 2777                           | 95%        | 121                        | 4%         | 0                                | 0%        |
| Zambia       | 3581               | 50%        | 3581                                  | 50%        | 2411                               | 100%       | 1361                           | 56%        | 1022                       | 42%        | 28                               | 1%        |
| Sierra Leone | 2204               | 49%        | 2205                                  | 49%        | 1490                               | 100%       | 833                            | 56%        | 639                        | 43%        | 22                               | 1%        |
| Liberia      | 1322               | 48%        | 1325                                  | 49%        | 932                                | 99%        | 581                            | 62%        | 324                        | 34%        | 22                               | 2%        |
| <b>Total</b> | <b>48315</b>       |            | <b>48378</b>                          |            | <b>29451</b>                       |            | <b>12678</b>                   |            | <b>15105</b>               |            | <b>1692</b>                      |           |
| <b>Mean</b>  |                    | <b>58%</b> |                                       | <b>58%</b> |                                    | <b>99%</b> |                                | <b>41%</b> |                            | <b>54%</b> |                                  | <b>5%</b> |

## Appendix 6. Problems with quality of malaria care when including overtreatment

| Country      | Fever reported in the last two weeks | Not blood tested <sup>a</sup> |            | Not treated with any drug <sup>b</sup> |            | Treated with one malarial drug <sup>b</sup> |            | Treated with more than two malarial drug |              | Receipt of treatment after 24 hours <sup>c</sup> |            | Patient encounters with problems on quality of malaria care <sup>d</sup> |            |
|--------------|--------------------------------------|-------------------------------|------------|----------------------------------------|------------|---------------------------------------------|------------|------------------------------------------|--------------|--------------------------------------------------|------------|--------------------------------------------------------------------------|------------|
|              | n                                    | n                             | %          | n                                      | %          | n                                           | %          | n                                        | %            | n                                                | %          | n                                                                        | %          |
| Sierra Leone | 1569                                 | 760                           | 48%        | 1528                                   | 95%        | 68                                          | 4%         | 1                                        | 0.04%        | 54                                               | 64%        | 3215                                                                     | 69%        |
| Angola       | 1095                                 | 652                           | 60%        | 821                                    | 76%        | 264                                         | 24%        | 0                                        | 0.00%        | 213                                              | 81%        | 4954                                                                     | 66%        |
| Uganda       | 1383                                 | 885                           | 64%        | 1249                                   | 90%        | 108                                         | 8%         | 0                                        | 0.00%        | 81                                               | 56%        | 3970                                                                     | 66%        |
| Gambia       | 437                                  | 319                           | 73%        | 464                                    | 97%        | 14                                          | 3%         | 0                                        | 0.00%        | 8                                                | 57%        | 2783                                                                     | 65%        |
| Nigeria      | 2542                                 | 2169                          | 85%        | 1857                                   | 73%        | 623                                         | 25%        | 9                                        | 0.37%        | 425                                              | 63%        | 2629                                                                     | 65%        |
| Mali         | 2041                                 | 1795                          | 88%        | 1636                                   | 80%        | 366                                         | 18%        | 0                                        | 0.00%        | 283                                              | 71%        | 4963                                                                     | 64%        |
| Malawi       | 1567                                 | 794                           | 51%        | 1000                                   | 76%        | 310                                         | 24%        | 0                                        | 0.00%        | 174                                              | 56%        | 2110                                                                     | 64%        |
| Ghana        | 933                                  | 462                           | 50%        | 550                                    | 62%        | 172                                         | 20%        | 0                                        | 0.00%        | 197                                              | 60%        | 1398                                                                     | 63%        |
| Swaziland    | 661                                  | 0                             | 0%         | 671                                    | 99%        | 4                                           | 1%         | 0                                        | 0.00%        | 4                                                | 100%       | 1484                                                                     | 62%        |
| Cameroon     | 1590                                 | 0                             | 0%         | 1229                                   | 81%        | 283                                         | 19%        | 0                                        | 0.00%        | 198                                              | 69%        | 985                                                                      | 60%        |
| Rwanda       | 877                                  | 612                           | 70%        | 836                                    | 96%        | 37                                          | 4%         | 0                                        | 0.00%        | 29                                               | 78%        | 2760                                                                     | 59%        |
| Kenya        | 1241                                 | 773                           | 62%        | 1234                                   | 98%        | 25                                          | 2%         | 0                                        | 0.00%        | 18                                               | 58%        | 1510                                                                     | 58%        |
| Liberia      | 1066                                 | 298                           | 28%        | 972                                    | 89%        | 108                                         | 10%        | 3                                        | 0.25%        | 91                                               | 72%        | 2315                                                                     | 56%        |
| Madagascar   | 1105                                 | 875                           | 79%        | 967                                    | 92%        | 79                                          | 8%         | 0                                        | 0.00%        | 64                                               | 79%        | 726                                                                      | 56%        |
| Cambodia     | 1348                                 | 1242                          | 92%        | 1321                                   | 100%       | 1                                           | 0%         | 0                                        | 0.00%        | 1                                                | 100%       | 1761                                                                     | 56%        |
| Tanzania     | 1560                                 | 1163                          | 75%        | 747                                    | 49%        | 781                                         | 51%        | 0                                        | 0.00%        | 476                                              | 61%        | 1940                                                                     | 56%        |
| Togo         | 797                                  | 518                           | 65%        | 543                                    | 71%        | 224                                         | 29%        | 0                                        | 0.00%        | 149                                              | 66%        | 2004                                                                     | 54%        |
| Burkina Faso | 2593                                 | 1764                          | 68%        | 1640                                   | 64%        | 903                                         | 35%        | 0                                        | 0.00%        | 609                                              | 65%        | 1500                                                                     | 53%        |
| Mozambique   | 1429                                 | 748                           | 52%        | 830                                    | 66%        | 434                                         | 34%        | 0                                        | 0.00%        | 435                                              | 100%       | 2327                                                                     | 52%        |
| Senegal      | 4442                                 | 0                             | 0%         | 4022                                   | 95%        | 167                                         | 4%         | 46                                       | 1.07%        | 182                                              | 81%        | 4083                                                                     | 51%        |
| Burundi      | 1736                                 | 514                           | 30%        | 1539                                   | 92%        | 127                                         | 8%         | 6                                        | 0.37%        | 69                                               | 50%        | 2369                                                                     | 50%        |
| Zambia       | 2651                                 | 1291                          | 49%        | 2609                                   | 96%        | 107                                         | 4%         | 0                                        | 0.00%        | 87                                               | 78%        | 664                                                                      | 50%        |
| Namibia      | 546                                  | 429                           | 79%        | 523                                    | 97%        | 13                                          | 2%         | 0                                        | 0.00%        | 13                                               | 81%        | 1440                                                                     | 49%        |
| Ethiopia     | 1412                                 | 0                             | 0%         | 1249                                   | 94%        | 83                                          | 6%         | 2                                        | 0.15%        | 85                                               | 100%       | 4609                                                                     | 49%        |
| Zimbabwe     | 744                                  | 655                           | 88%        | 741                                    | 99%        | 6                                           | 1%         | 0                                        | 0.00%        | 4                                                | 50%        | 1489                                                                     | 47%        |
| <b>Mean</b>  |                                      |                               | <b>54%</b> |                                        | <b>85%</b> |                                             | <b>14%</b> |                                          | <b>0.09%</b> |                                                  | <b>72%</b> |                                                                          | <b>58%</b> |

**Appendix 7. Problems with malaria care quality among under-5 children who were eligible to go through all the treatment cascades**

| Country        | Cases eligible to go through all cascades | Treated with one malarial drug <sup>b</sup> |            | Treated with more than two antimalarial drug |       | Receipt of treatment after 24 hours <sup>c</sup> |            | Patient encounters with problems on quality of malaria care <sup>d</sup> |            |
|----------------|-------------------------------------------|---------------------------------------------|------------|----------------------------------------------|-------|--------------------------------------------------|------------|--------------------------------------------------------------------------|------------|
|                | n                                         | n                                           | %          | n                                            | %     | n                                                | %          | n                                                                        | %          |
| Uganda         | 57                                        | 41                                          | 72%        |                                              |       | 25                                               | 44%        | 38                                                                       | 67%        |
| Gambia         | 9                                         | 9                                           | 100%       |                                              |       | 4                                                | 44%        | 5                                                                        | 56%        |
| Burundi        | 81                                        | 77                                          | 95%        | 0                                            | 0.0%  | 42                                               | 52%        | 43                                                                       | 53%        |
| Sierra Leone   | 51                                        | 39                                          | 76%        | 1                                            | 2.0%  | 31                                               | 61%        | 26                                                                       | 51%        |
| Ghana          | 174                                       | 81                                          | 47%        |                                              |       | 111                                              | 64%        | 88                                                                       | 51%        |
| Kenya          | 15                                        | 11                                          | 73%        |                                              |       | 8                                                | 53%        | 7                                                                        | 47%        |
| Tanzania       | 254                                       | 254                                         | 100%       |                                              |       | 137                                              | 54%        | 117                                                                      | 46%        |
| Malawi         | 244                                       | 242                                         | 99%        |                                              |       | 136                                              | 56%        | 106                                                                      | 43%        |
| Senegal        | 44                                        | 33                                          | 75%        | 5                                            | 11.4% | 36                                               | 82%        | 17                                                                       | 39%        |
| Nigeria        | 133                                       | 113                                         | 85%        | 3                                            | 2.3%  | 96                                               | 72%        | 49                                                                       | 37%        |
| Liberia        | 81                                        | 65                                          | 80%        | 1                                            | 1.2%  | 60                                               | 74%        | 29                                                                       | 36%        |
| Burkina Faso   | 462                                       | 447                                         | 97%        |                                              |       | 303                                              | 66%        | 164                                                                      | 35%        |
| Togo           | 160                                       | 160                                         | 100%       |                                              |       | 105                                              | 66%        | 55                                                                       | 34%        |
| Madagascar     | 25                                        | 24                                          | 96%        |                                              |       | 18                                               | 72%        | 8                                                                        | 32%        |
| Zambia         | 76                                        | 72                                          | 95%        |                                              |       | 59                                               | 78%        | 21                                                                       | 28%        |
| Mali           | 104                                       | 92                                          | 88%        |                                              |       | 80                                               | 77%        | 26                                                                       | 25%        |
| Angola         | 162                                       | 162                                         | 100%       |                                              |       | 130                                              | 80%        | 32                                                                       | 20%        |
| Namibia        | 8                                         | 7                                           | 88%        |                                              |       | 8                                                | 100%       | 1                                                                        | 13%        |
| Rwanda         | 25                                        | 25                                          | 100%       |                                              |       | 22                                               | 88%        | 3                                                                        | 12%        |
| Mozambique     | 296                                       | 295                                         | 100%       |                                              |       | 296                                              | 100%       | 1                                                                        | 0%         |
| Cambodia       | 1                                         | 1                                           | 100%       |                                              |       | 1                                                | 100%       | 0                                                                        | 0%         |
| Zimbabwe       | 1                                         | 1                                           | 100%       |                                              |       | 1                                                | 100%       | 0                                                                        | 0%         |
| <b>Average</b> |                                           |                                             | <b>89%</b> |                                              |       |                                                  | <b>72%</b> |                                                                          | <b>33%</b> |

**Appendix 8. Problems with quality of malaria care among febrile children under-five in Tanzania noted with the largest regional difference of 30**

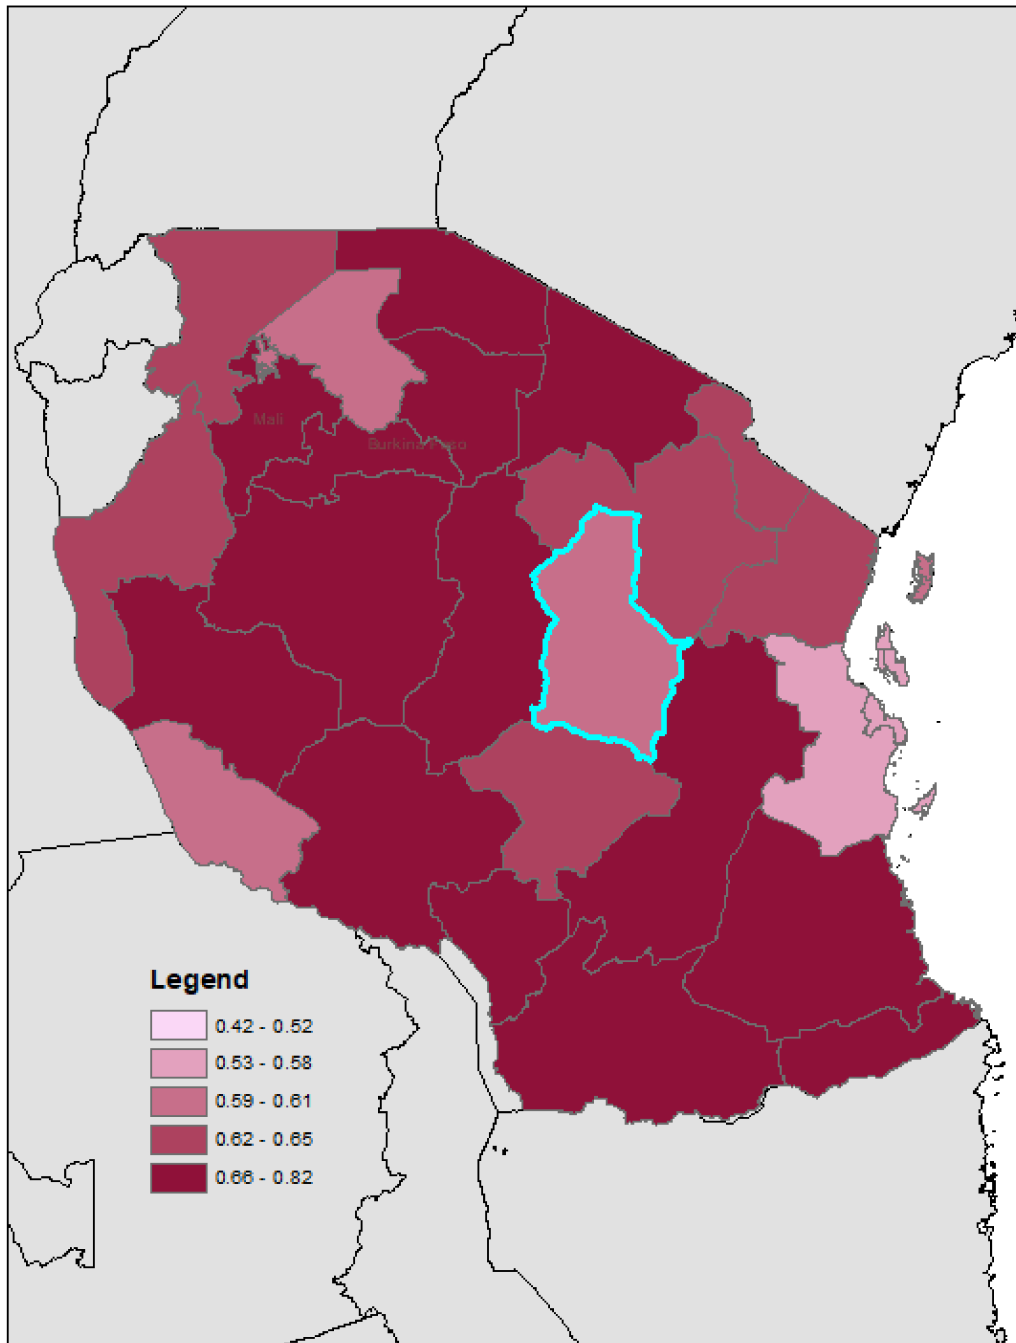

Note: Highlighted area is Dodoma, the capital city of Tanzania, where quality of malaria care was found to be only slightly better than the neighboring regions.

## Appendix 9. Differences in malaria care quality scores by country

| Country      | Minimum regional quality score | Maximum regional quality score | Difference in scores |
|--------------|--------------------------------|--------------------------------|----------------------|
| Swaziland    | 0.50                           | 0.51                           | 0.01                 |
| Senegal      | 0.48                           | 0.51                           | 0.03                 |
| Nigeria      | 0.63                           | 0.67                           | 0.04                 |
| Burundi      | 0.50                           | 0.55                           | 0.04                 |
| Malawi       | 0.53                           | 0.59                           | 0.05                 |
| Mali         | 0.63                           | 0.69                           | 0.06                 |
| Gambia       | 0.49                           | 0.56                           | 0.07                 |
| Togo         | 0.57                           | 0.64                           | 0.07                 |
| Angola       | 0.55                           | 0.63                           | 0.08                 |
| Liberia      | 0.45                           | 0.54                           | 0.09                 |
| Cambodia     | 0.57                           | 0.67                           | 0.09                 |
| Zimbabwe     | 0.57                           | 0.66                           | 0.09                 |
| Madagascar   | 0.58                           | 0.68                           | 0.10                 |
| Ethiopia     | 0.51                           | 0.61                           | 0.10                 |
| Cameroon     | 0.55                           | 0.65                           | 0.10                 |
| Rwanda       | 0.51                           | 0.62                           | 0.11                 |
| Uganda       | 0.48                           | 0.60                           | 0.12                 |
| Mozambique   | 0.58                           | 0.71                           | 0.13                 |
| Kenya        | 0.45                           | 0.60                           | 0.15                 |
| Ghana        | 0.43                           | 0.58                           | 0.15                 |
| Sierra Leone | 0.45                           | 0.60                           | 0.15                 |
| Zambia       | 0.42                           | 0.59                           | 0.16                 |
| Burkina Faso | 0.54                           | 0.70                           | 0.16                 |
| Namibia      | 0.52                           | 0.68                           | 0.17                 |
| Tanzania     | 0.52                           | 0.82                           | 0.30                 |
